# 1 EVALUATION OF STED SUPER-RESOLUTION IMAGE QUALITY BY IMAGE 2 CORRELATION SPECTROSCOPY (QuICS)

3 Elena Cerutti<sup>1,2</sup>, Morgana D'Amico<sup>1</sup>, Isotta Cainero<sup>2</sup>, Gaetano Ivan Dellino<sup>3,4</sup>, Mario Faretta<sup>3</sup>, Giuseppe Vicidomini<sup>5</sup>,  
4 Pier Giuseppe Pelicci<sup>3,4</sup>, Paolo Bianchini<sup>2</sup>, Alberto Diaspro<sup>2,6</sup>, Luca Lanzano<sup>1,2,\*</sup>

5 <sup>1</sup>Department of Physics and Astronomy "Ettore Majorana", University of Catania, Via S. Sofia 64, 95123 Catania,  
6 Italy

7 <sup>2</sup>Nanoscopy and NIC@IIT, CHT Erzelli, Istituto Italiano di Tecnologia, Via Enrico Melen 83, Building B, 16152 Genoa,  
8 Italy

9 <sup>3</sup>Department of Experimental Oncology, IEO, European Institute of Oncology IRCCS, 20100 Milan, Italy

10 <sup>4</sup>Department of Oncology and Hemato-Oncology, University of Milan, 20100 Milan, Italy

11 <sup>5</sup>Molecular Microscopy and Spectroscopy, CHT Erzelli, Istituto Italiano di Tecnologia, Via Enrico Melen 83, Building  
12 B, 16152 Genoa, Italy

13 <sup>6</sup>DIFILAB, Department of Physics, University of Genoa, via Dodecaneso 33, 16143 Genoa, Italy

14 \*Corresponding author: [luca.lanzano@unict.it](mailto:luca.lanzano@unict.it)

## 15 ABSTRACT

16 Quantifying the imaging performances in an unbiased way is of outmost importance in super-resolution  
17 microscopy. Here, we describe an algorithm based on image correlation spectroscopy (ICS) that can be used to  
18 assess the quality of super-resolution images. The algorithm is based on the calculation of an autocorrelation  
19 function and provides three different parameters: the width of the autocorrelation function, related to the spatial  
20 resolution; the brightness, related to the image contrast; the relative noise variance, related to the signal-to-noise  
21 ratio of the image. We use this algorithm to evaluate the quality of stimulated emission depletion (STED) images  
22 of DNA replication foci in U937 cells acquired under different imaging conditions. Increasing the STED power  
23 improves the resolution but may reduce the image contrast. Increasing the number of line averages improves the  
24 signal-to-noise ratio but facilitates the onset of photobleaching and subsequent reduction of the image contrast.  
25 Finally, we evaluate the performances of two different separation of photons by lifetime tuning (SPLIT)  
26 approaches: the method of tunable STED power and the commercially available Leica Tau-STED. We find that  
27 SPLIT provides an efficient way to improve the resolution and contrast in STED microscopy.

## 28 INTRODUCTION

29 Super-Resolution Microscopy (SRM) circumvents the spatial resolution limit imposed by the diffraction of light at  
30 about half of the illumination wavelength (200-250 nm for visible wavelength). Among the super-resolution  
31 techniques developed in the last decade, some of them, grouped under the term of nanoscopy, can theoretically  
32 reach diffraction-unlimited resolution, down to molecular size <sup>1</sup>. The common working principle of these  
33 techniques is to transiently transfer the fluorophores in two recognizable states (usually a dark OFF state and a  
34 bright ON state in response to different stimuli); this allows the subsequent sequential detection of signals  
35 originating from regions much smaller than the diffraction limit <sup>2,3</sup>. Among the super resolution techniques that  
36 do not require a complex image reconstruction process, the most used is Stimulated Emission Depletion  
37 microscopy (STED): STED microscopy overcomes the diffraction limit by reversibly switching off (depleting)  
38 fluorophores at the periphery of the diffraction-limited excitation regions. The depletion is achieved thanks to a  
39 second beam (the so-called STED beam) tuned in wavelength to induce stimulated emission and engineered in  
40 phase to create a doughnut-like shaped intensity profile at the focus. By increasing the intensity of the STED beam,  
41 stimulated emission wins the competition against spontaneous emission of fluorophores and allows to register  
42 fluorescence only from those fluorophores localized in a tiny sub-diffraction volume at the center of the excited  
43 region <sup>4</sup>.

44 Although nanoscopy techniques and STED, in particular, can theoretically achieve unlimited resolution,  
45 experimental constraints on biological samples considerably reduce the spatial resolution improvement to about  
46 20 nm. Moreover, a series of factors related to cell labelling <sup>5,6</sup> and image acquisition <sup>7-11</sup> must be carefully assessed  
47 and adjusted depending on the biological mechanism under investigation. Examples of acquisition parameters  
48 that must be carefully adjusted in STED microscopy are the STED beam intensity, the excitation beam integration  
49 and the pixel dwell-time. Typically, one has to find a trade-off between several conditions to avoid the onset of  
50 unwanted sample degradation effects such as fluorophore photobleaching. This trade-off is often specific for the  
51 biological sample considered and cannot be easily determined using calibration samples (i.e., fluorescent  
52 spheres). Thus, quantifying the imaging performances directly on the acquired images, in an unbiased way, is of  
53 outmost importance <sup>10, 12-15</sup>.

54 Here, we introduce a simple algorithm to evaluate systematically and in an unbiased way the quality of STED  
55 images by image correlation spectroscopy (QuICS). Image correlation spectroscopy (ICS) is a general and versatile  
56 method to quantitatively analyze fluorophore distribution in microscopy images <sup>16</sup>. ICS can be used to extract  
57 parameters such as size <sup>17</sup>, distances <sup>18, 19</sup> and aggregation state <sup>20</sup> from static images and dynamic parameters  
58 such as diffusion coefficient <sup>21</sup> and velocity <sup>22</sup> from time-resolved images. In this work, we focus only on the analysis

59 of static images. We apply ICS to extract three quantities that are related to the quality of the super-resolved  
60 image: the width of the autocorrelation function, related to the spatial resolution; the brightness, related to the  
61 image contrast; the relative noise variance, related to the signal-to-noise ratio of the image. Within this study, we  
62 describe how the modulation of image acquisition parameters can influence STED efficiency and the image  
63 formation of DNA replication sites in U937-PR9 cells, an in vitro model of leukemia<sup>23</sup>. Our study reveals that to  
64 optimize the imaging conditions for a given sample, a balance between different parameters must be found. We  
65 found a valid solution to this elusive balance by applying the method of Separation of Photons by Lifetime Tuning  
66 (SPLIT)<sup>24, 25</sup> to STED microscopy. In particular, we show SPLIT images obtained using the method of tunable STED  
67 power<sup>25, 26</sup>, or acquired by a recently developed, lifetime-based commercial setup (the Leica Tau-STED  
68 microscope). QuICS analysis reveals that SPLIT images have higher resolution and non-reduced brightness and  
69 noise parameters, compared to their counterpart STED images.

70 We developed the QuICS algorithm base on the growing need for analysis of nuclear processes performed at the  
71 level of individual cells, also taking into account that certain events typically occur in a relatively small fraction of  
72 cells in the population at any given time (i.e., events taking place in a specific phase of the cell cycle). Recent  
73 advances observed a considerable variability and heterogeneity in genome organization at the single-cell level<sup>27</sup>.  
74 Imaging and super-resolution can thus provide a unique view of nuclear organization and functions in intact cell  
75 nuclei.

## 76 RESULTS

### 77 Autocorrelation function as a source of information about image quality

78 In order to extract a series of parameters associated to an image  $I(x,y)$ , we start by calculating a radial  
79 autocorrelation function (ACF)  $G(\rho)$ . This function is calculated by performing an angular average on the two-  
80 dimensional ACF  $G(\delta x, \delta y)$  (see Methods). In general, the function  $G(\rho)$  contains information on all the intensity  
81 variations in the image, including fluctuations due to statistical noise. Let's call  $G_{NF}(\rho)$  the noise-free correlation  
82 function, i.e. the corresponding function in the absence of noise. By fitting  $G_{NF}(\rho)$  to a Gaussian model (see Eq.  
83 (5)), we extract the amplitude  $G_{NF}(0)$  and the width parameter  $w$ . We define the following three quantities (Figure  
84 1):

$$R = \sqrt{2 \ln 2} w \quad (1)$$

$$B = G_{NF}(0) I_{av} \quad (2)$$

$$N = \frac{G(0) - G_{NF}(0)}{G_{NF}(0)} \quad (3)$$

85 Where we have indicated  $I_{av}$  as the average intensity value over all the pixels of the image.

86 In order to understand the physical meaning of R, B and N, let's assume, for simplicity, that the sample contains  
87 randomly distributed point-like fluorescent particles so that the corresponding image is the convolution of the  
88 emitters and the Point Spread Function (PSF) of the optical system. In this case, R corresponds to the resolution  
89 of the optical system expressed in terms of the Full Width at Half Maximum (FWHM) of the PSF,  $R=FWHM_{PSF}$ . More  
90 in general, since the sample may contain features of finite size, it will be  $R \geq FWHM_{PSF}$ . Thus, the estimated  
91 resolution of the optical system is at least equal to R.

92 The quantity B in Eq. (2) is called brightness<sup>28, 29</sup> and is equal to  $\sigma_p^2/I_{av}$  where  $\sigma_p^2$  is the variance of the intensity  
93 due to the particles. The brightness of the particles depends on the number of fluorophores per particle and on  
94 the actual brightness of the fluorophores at the specific imaging settings (e.g. excitation intensity level, detector  
95 gain, pixel dwell time). Let's assume that, in addition to the signal from the particles, whose average intensity is  
96  $I_{av,p}$ , there is a uniform background signal, with average intensity  $I_{av,bkgd}$ , so that  $I_{av} = I_{av,p} + I_{av,bkgd}$ . The brightness is  
97 given by  $B = \sigma_p^2 / (I_{av,p} + I_{av,bkgd})$ . Thus, a reduction of the brightness parameter B is related to a decrease in the  
98 contrast of the particles in the image.

99 Finally, we note that  $G_{NF}(0) = \sigma_p^2 / I_{av}^2$  and  $G(0) = (\sigma_p^2 + \sigma_{noise}^2) / I_{av}^2$ , where  $\sigma_{noise}^2$  is the variance of the intensity due to  
100 noise. Thus, the quantity N in Eq. (3),  $N = \sigma_{noise}^2 / \sigma_p^2$ , represents the variance of the noise normalized to the variance  
101 of the particles (relative noise variance). We use N to quantify the noise level in the image, where the limits  $N=0$   
102 indicates no noise, and  $N=1$  indicates that intensity fluctuations due to noise are comparable to those due to the  
103 particles.

104 The noise-free correlation function,  $G_{NF}(\rho)$ , required for this analysis, can be obtained by cross-correlating two  
105 statistically independent realizations of the same image, in analogy to what is done in Fourier Ring Correlation  
106 (FRC) methods<sup>12-14</sup>. The acquisition of two statistically independent images is straightforward in single-molecule  
107 localization microscopy but can be a more difficult task with other super-resolution techniques<sup>15</sup>. In order to  
108 estimate  $G_{NF}(\rho)$  from a single acquired image, we propose performing a fit of the autocorrelation function  $G(\rho)$   
109 either skipping the first points, or cross-correlating two statistically independent images obtained by down-  
110 sampling the original image<sup>30</sup>. In our experimental data, the two approaches provided similar results  
111 (Supplementary Figure 1).

## 112 **Tuning of STED power**

113 During STED image acquisition, the most intuitive way to improve the resolution is to increase the STED beam's  
114 intensity. To validate our method as a function of the STED beam intensity, we acquired images of U937-PR9 cells

115 samples in which we were able to visualize the DNA replication thanks to the incorporation of the nucleoside  
116 Ethynyl deoxyuridine (EdU) to the newly replicated DNA strand. We then coupled the EdU molecule to an azide  
117 molecule carrying the Alexa fluorophore, taking advantage of a Cu-catalyzed Click-iT reaction. During microscopy  
118 acquisition, we took care of choosing, among the sample, actively replicating cells with DNA replication sites  
119 spread all over the nucleus and thus more suitable for resolution evaluation analysis.

120 First, we acquired a confocal and a STED image of a cell nucleus (Figure 2A, upper row) by applying a relatively  
121 small depletion beam power (9 mW) and the two line profiles of the same structure were plotted to compare the  
122 achieved resolution (Figure 2B, upper panel). Then, we acquired a confocal and a STED image of a second nucleus,  
123 doubling the power of the depletion beam (Figure 2A, lower row), and we compared the line profiles of the same  
124 structure from the confocal and the STED image. The line profile analysis yielded FWHM=189 nm and FWHM=212  
125 nm for the two peaks detected at 9 mW, and FWHM=160 nm and FWHM=178 nm for the two peaks detected at  
126 18 mW. However, this result depends on the specific structures selected for the line profile analysis and does not  
127 take into account the totality of labeled sites in the whole cell nucleus.

128 Therefore, we acquired at least ten STED images with each of the two different depletion beam powers, and we  
129 calculated the autocorrelation function in order to obtain the average resolution  $R$  related to the entire nuclei. As  
130 a result, we obtained that the doubling of the STED beam lead to an improvement of spatial resolution from  $R=234$   
131  $\pm 3$  nm to  $R=213 \pm 3$  nm (mean  $\pm$  s.d., Figure 2C). This result is in keeping with the line profile analysis, as expected,  
132 and represents an average of the whole nucleus structures. The obtained values of  $R$  strongly depend on the  
133 average apparent size of the structures (i.e. replication foci) in the images, meaning the molecular volume plus  
134 the resolution, and therefore their values are larger than the maximum resolution of the optical system.

135 In contrast, we observed that the image brightness  $B$  was significantly lower for the images acquired with the  
136 higher STED power (Figure 2D). We interpreted this reduction of  $B$  as a reduction in the image contrast. In fact,  
137 we compared images acquired exactly with all the same instrumental settings (e.g. same excitation power, same  
138 detector gain, same pixel dwell-time) other than the STED power. In this case, the action of STED reduces the  
139 average intensity per pixel due to the particles but does not decrease the average intensity of the background  
140 signal (originating, for instance, from undepleted out-of-focus fluorescence signal<sup>24, 31, 32</sup>). As explained in the  
141 previous section, this causes a reduction of the parameter  $B$ .

142 Finally, we observed that the relative noise variance  $N$  was higher at the higher STED power (Figure 2E). This is in  
143 line with the expected reduction of signal-to-noise ratio at increasing STED power.

## 144 **Increasing number of averages**

145 The common approach for reducing the noise in an image is to increase the number of collected photons per pixel.  
146 In general, this can be achieved by tuning the number of scans for each pixel and then averaging the intensity  
147 values for each pixel position.

148 To evaluate how increasing averages would influence the quality of the image, we acquired sequential STED  
149 images of the same cell, with a depletion beam power of 18 mW (see Methods for a detailed description of the  
150 sequential acquisition settings). From each sequential acquisition, we generated STED images with a different  
151 number of line-averages (Figure 3A) and applied the QuICS algorithm. As expected, the image's noise significantly  
152 decreased as soon as we doubled the number of line averaging (Figure 3B). On the other hand, the average  
153 resolution  $R$  did not improve with an increasing number of averages (Figure 3C). The brightness  $B$  decreased as a  
154 function of the number of averages (Figure 3D) indicating a reduction of the contrast.

155 To interpret these results, we monitored photobleaching as a function of the number of averages of the STED  
156 image (Figure 3E). Photobleaching was calculated as the percentage reduction of average fluorescence intensity  
157 with respect to the initial value. We observed that each line averages-acquisition step induced a significant  
158 increase in photobleaching of the sample's fluorophores (Figure 3E). Consequently, the image contrast decreased,  
159 thus leading to a brightness reduction as a function of the number of averages (Figure 3D,F). These data also show  
160 that, in our samples, for photobleaching levels above about 40%, there is no significant improvement in the signal-  
161 to-noise ratio of the images (Figure 3B,F). Thus, in case it cannot be avoided, photobleaching should be at least  
162 kept below this level.

## 163 **Comparison between SPLIT and STED imaging**

164 To increase the spatial resolution of a STED microscope, the most straightforward way is to increase the depletion  
165 beam's intensity. However, as we have seen, this may reduce the contrast and signal-to-noise of the images,  
166 quantified in QuICS via the brightness and noise parameters. Here, we examine the advantages of increasing  
167 spatial resolution via application of Separation of Photons by Lifetime Tuning (SPLIT)<sup>24</sup>. The SPLIT method provides  
168 an increase in spatial resolution by decoding the spatial information encoded into an additional channel. The first  
169 reported SPLIT configuration exploited, as an additional channel, the fluorescence lifetime gradient induced by a  
170 continuous-wave STED beam<sup>24, 33</sup>. Subsequent studies demonstrated that SPLIT is not limited to analysis of  
171 fluorescence lifetimes. SPLIT could also be applied to stacks of STED images obtained with tunable depletion  
172 power, with the depletion power used as the additional channel for SPLIT<sup>25, 26</sup>, or even to structured illumination  
173 microscopy images<sup>34</sup>.

174 As described in Figure 4A, we first applied the SPLIT method to stacks consisting of two STED images at different  
175 depletion power: a confocal (0 mW STED power) and a STED image (18 mW STED power). In this case, the  
176 fluorescence intensity variations due to the tuning of the STED power, allow the separation of the contributions  
177 from fluorophores in the center or the periphery of the PSF (Figure 4A). Since the excitation intensity can also be  
178 easily tuned along the stack <sup>26</sup>, we set the excitation level of the confocal image so that it induced negligible  
179 photobleaching. In this way, the data acquisition for SPLIT was straightforward and did not induce more  
180 photobleaching than the acquisition of the STED image alone. Figure 4B shows application of this approach to  
181 imaging of replication foci in a U937-PR9 cell in S phase. Shown are the confocal, the STED image and the resulting  
182 SPLIT image. We compared the line profiles of the same structure and we observed a resolution improvement  
183 from FWHM=147 nm and FWHM=154 nm, for the two peaks detected in the STED line profile, to FWHM=135 nm  
184 and FWHM=107 nm, for the two peaks detected in the SPLIT line profile (Figure 4C). QuICS analysis of at least ten  
185 samples, revealed a significant improvement in the average resolution of the SPLIT image ( $R=129 \pm 9$  nm, mean  $\pm$   
186 s.d.) compared to the STED image ( $R=213 \pm 9$  nm, mean  $\pm$  s.d.) (Figure 4D). Notably, this improvement in resolution  
187 is not achieved at the expense of the image brightness (Figure 4E) or the signal-to-noise ratio (Figure 4F).

188 Figure 4G shows an image of replication foci in a U937-PR9 cell in late S-phase acquired with the Leica Tau-STED  
189 microscope. Here the SPLIT image (i.e. the Tau-STED image) is compared with the STED image and with a time-  
190 gated STED image (time gate=1-8 ns). QuICS analysis indicates an improvement of resolution from  $R=199$  nm (STED  
191 image) and  $R=191$  nm (gated-STED image) to  $R=163$  nm (Tau-STED image) (Figure 4H). The brightness is  
192 significantly higher in the Tau-STED image than in the STED and gated-STED images (Figure 4I). This increase in  
193 brightness is probably due to the improvement of contrast provided by SPLIT, which has the capability of filtering  
194 out background signal originating for instance by direct excitation from the STED beam <sup>24</sup>. The gated-STED image  
195 has lower SNR than the STED image, as time-gating reduces the number of photons available for image formation  
196 (Figure 4J). The SPLIT image has higher SNR than the STED and gated-STED images, in line with the overall  
197 reduction of background in the image (Figure 4J) and in keeping with previous studies <sup>35</sup>.

## 198 DISCUSSION

199 Applications of super-resolution microscopy to biology are increasing. However, despite the availability of several  
200 types of commercial setups, optimization of the conditions of imaging still requires some degree of expertise. It is  
201 important to find the conditions that maximize the quality of the image, paying attention to the onset of  
202 potentially degrading effects such as fluorophore photobleaching. Our approach provides an unbiased  
203 measurement of the super-resolution image quality based on the three parameters R, B, N defined by Eq. (1)(2)(3).  
204 We note that R and N can be readily used to compare the resolution and signal-to-noise ratio of images acquired

205 under different conditions. On the other hand, B depends on the image contrast, but also on many instrumental  
206 factors (e.g., the excitation intensity level, the detector gain, and the pixel dwell-time) that should be considered  
207 when performing any comparison.

208 There is an important difference between QuICS and the FRC method. The FRC resolution merges into a single  
209 parameter information about both the relevant spatial frequencies and the noise content of an image. In other  
210 words, the FRC resolution describes the length scale below which the image lacks signal content<sup>13</sup>. In QuICS, the  
211 resolution parameter R contains average information on the characteristic size (e.g. specimen features, PSF of the  
212 optical system) whereas the parameter N contains information on the noise content of the image. In the limit of  
213 infinitely high signal-to-noise ratio, the two values of resolution extracted by QuICS and FRC are the same.  
214 Conversely, for low signal-to-noise ratio, we expect the FRC value to increase whereas the QuICS resolution to  
215 remain constant, since it represents the average apparent size of particles in the image (or the size of the PSF, in  
216 the limit of point-like particles). Thus, an advantage of QuICS is that the same algorithm can be used not only to  
217 evaluate the image quality but also to quantify biophysical parameters such as the size and the molecular  
218 brightness, important in many biophysical applications<sup>16, 17, 28, 29, 36</sup>.

219 The combination of super-resolution microscopy with the correlation spectroscopy toolbox undoubtedly offers  
220 several advantages<sup>37</sup>. Here, we have shown how analysis of an angle-averaged, image correlation function can  
221 provide useful hints on the optimization of the imaging conditions. As a case study, we have focused our attention  
222 on STED imaging of DNA replication foci in fixed U937 cells. However, even if not demonstrated, we expect that  
223 the approach can be adapted to images containing arbitrary features (for instance cytoskeletal structures).  
224 Similarly, we expect that it can be used to evaluate the quality of images acquired in confocal microscopy or other  
225 types of super-resolution techniques.

## 226 **METHODS**

### 227 **Cell culture and treatments**

228 U937-PR9 cells were cultured in RPMI-1640 medium (Sigma Aldrich R7388) supplemented with 1%  
229 penicillin/streptomycin (Sigma-Aldrich P4333) and 10% fetal bovine serum (Sigma-Aldrich F9665) and maintained  
230 at 37°C and 5% CO<sub>2</sub>. U937-PR9 were seeded on poly-L-lysine (Sigma-Aldrich P8920) coated glass coverslips  
231 immediately before experiments. Cells were incubated with 10 μM of the synthetic nucleoside 5-Ethynyl-2'-  
232 deoxyuridine (EdU) (Thermo Fisher Scientific) for 25 min at 37°C and 5% CO<sub>2</sub>.



### 233 **EdU fluorescent labelling**

234 Upon nucleoside incorporation, cells were washed with Phosphate Buffer Saline (PBS), fixed with 4%  
235 paraformaldehyde (w/v) for 10 min at room temperature and permeabilized with 0.5% (v/v) Triton X-100 in PBS  
236 for 20 min. Cells were then incubated for 30 min with the Click-iT reaction cocktail containing Alexa Fluor azide  
237 488 (Invitrogen C10337) or Alexa Fluor azide 594 (Invitrogen C10639), according to the manufacturer's  
238 instructions. Samples were then extensively washed with PBS and mounted on glass slides with ProLong Diamond  
239 Antifade Mountant (Invitrogen P36961).

### 240 **Image acquisition**

241 Images of Figures 2, 3 and 4B were acquired on a Leica TCS SP5 gated-STED microscope, using an HCX PL APO 100X  
242 100/1.40/0.70 oil immersion objective lens (Leica Microsystems, Mannheim, Germany). Emission depletion was  
243 accomplished with a 592 nm STED laser. Excitation was provided by a white laser at the desired wavelength for  
244 each sample. Alexa488 was excited at 488 nm and its fluorescence emission detected at 500-560 nm, with 1.5-5  
245 ns time gating using a hybrid detector (Leica Microsystems). 512 X 512 pixel images were acquired with a pixel  
246 size of 20 nm.

247 For the experiment reported in Figure 3, the first four STED images were acquired with 16 averages per pixel line,  
248 while the fifth image was acquired with 64 averages. We designed this experiment intending to mimic an  
249 acquisition with 128 line averages and to be able to monitor the trend of the resolution, noise, and brightness  
250 after each 16-averages step. Besides, before and after each STED image, we also acquire a confocal image, in order  
251 to monitor the trend of the photobleaching after each STED acquisition. To do so we carefully choose the confocal  
252 acquisition parameters in order to induce a confocal-related negligible photobleaching. The final images were  
253 then obtained by combining and averaging STED images after each acquisition step so that the resulting image  
254 had 16+16 averages, 16+16+16 averages and so on (Figure 3A).

255 Images of Figure 4G were acquired on a Leica Stellaris 8 Tau-STED microscope, using an HC PL APO CS2 100x/1.40  
256 oil immersion objective lens (Leica Microsystems, Mannheim, Germany). Emission depletion was accomplished  
257 with a 775 nm STED laser. Excitation was provided by a white light laser at the desired wavelength for each sample.  
258 Alexa594 was excited at 561 nm and its fluorescence emission detected at 570-620 nm using a hybrid detector  
259 (Leica Microsystems). 1024 X 1024 pixel images were acquired with a pixel size of 14 nm.

## 260 **Generation of SPLIT images**

261 Separation of photon by lifetime tuning (SPLIT) images in Fig.4B were generated using the method of tunable  
262 depletion power<sup>25,26</sup>. A simplified version of the algorithm described in<sup>24</sup> was implemented in Matlab and applied  
263 to two-frame stacks consisting of a confocal and a STED image.

## 264 **QuICS algorithm**

265 The QuICS analysis was performed in MATLAB (The MathWorks) using a custom code. Given an image  $I(x,y)$ , a  
266 two-dimensional (2D) image correlation function was calculated as:

$$G_{2D}(\delta_x, \delta_y) = \frac{\langle I(x, y)I(x + \delta_x, y + \delta_y) \rangle}{\langle I(x, y) \rangle^2} - 1 \quad (4)$$

267

268 Where the angle brackets indicate averaging over all the selected pixels of the image. The numerator in Eq. (4)  
269 was calculated by a 2D fast Fourier transform algorithm. Before calculation, a region of interest (ROI)  
270 corresponding to the nucleus was defined using the counterstain signal and the corresponding mask has been  
271 applied to the image as described previously<sup>18,38</sup>. This step is useful to minimize the effects of nuclear borders on  
272 the correlation functions. The 2D correlation function was then converted into one-dimensional radial correlation  
273 function,  $G(\rho)$ , by performing an angular mean<sup>17</sup>.

274 To estimate the noise-free correlation function from a single image, we performed a Gaussian fit of the radial  
275 correlation function  $G(\rho)$  by skipping the first points:

$$G_{NF}(\rho) = G_{NF}(0)e^{-\frac{\rho^2}{w^2}} + G_{NF}(\infty) \quad (5)$$
$$\rho \in [\rho_{min}, \rho_{max}]$$

276

277 Where the width parameter  $w$  corresponds to the  $1/e^2$  of a Gaussian function and it is related to the Full Width  
278 Half Maximum (FWHM) by the relationship  $w = \text{FWHM} / (2 \ln 2)^{1/2}$ ;  $G_{NF}(0)$  represents the amplitude;  $G_{NF}(\infty)$   
279 represents an offset value. The fitting range was determined as follows. The values  $\rho_{min}$  and  $\rho_{max}$  were set, by visual  
280 inspection of the data, in such a way to exclude the first points and fit a single Gaussian component  
281 (Supplementary Figure 1).

282 As an alternative approach, we generated two independent images  $I'(x,y)$  and  $I''(x,y)$  by downsampling the image  
283  $I(x,y)$  to half the size. The image  $I'(x,y)$  was obtained by averaging the intensity of pixel  $(i,j)$  with that of pixel  $(i+1,$   
284  $j+1)$ , with  $i+j$  even. The image  $I''(x,y)$  was obtained by averaging the intensity of pixel  $(i,j)$  with that of pixel  $(i+1,$

285  $j+1$ ), with  $i+j$  odd. The images  $I'(x,y)$  and  $I''(x,y)$  were then resampled back to the original size. The 2D cross-  
286 correlation function was calculated as:

$$G_{2D,cc}(\delta_x, \delta_y) = \frac{I'(x, y)I''(x + \delta_x, y + \delta_y)}{I'(x, y)I''(x, y)} - 1 \quad (6)$$

287

288 The 2D cross-correlation function was then converted into a one-dimensional radial cross-correlation function,  
289  $G_{cc}(\rho)$  and fitted with Eq. (5) by setting  $\rho_{\min}=0$ . The two approaches yielded similar results in our data  
290 (Supplementary Figure 1).

291 A user-friendly version of the Matlab code is available at <https://github.com/lanzano/QuICS>.

## 292 REFERENCES

- 293 1. Eggeling, C.; Willig, K. I.; Sahl, S. J.; Hell, S. W., Lens-based fluorescence nanoscopy. *Q Rev Biophys* **2015**,  
294 *48* (2), 178-243.
- 295 2. Hell, S. W., Far-field optical nanoscopy. *Science* **2007**, *316* (5828), 1153-8.
- 296 3. Schermelleh, L.; Ferrand, A.; Huser, T.; Eggeling, C.; Sauer, M.; Biehlmaier, O.; Drummen, G. P. C., Super-  
297 resolution microscopy demystified. *Nat Cell Biol* **2019**, *21* (1), 72-84.
- 298 4. Vicidomini, G.; Bianchini, P.; Diaspro, A., STED super-resolved microscopy. *Nature methods* **2018**, *15* (3),  
299 173-182.
- 300 5. Lau, L.; Lee, Y. L.; Sahl, S. J.; Stearns, T.; Moerner, W. E., STED microscopy with optimized labeling density  
301 reveals 9-fold arrangement of a centriole protein. *Biophys J* **2012**, *102* (12), 2926-35.
- 302 6. Stanly, T. A.; Fritzsche, M.; Banerji, S.; García, E.; Bernardino de la Serna, J.; Jackson, D. G.; Eggeling, C.,  
303 Critical importance of appropriate fixation conditions for faithful imaging of receptor microclusters. *Biol Open*  
304 **2016**, *5* (9), 1343-50.
- 305 7. Leutenegger, M.; Eggeling, C.; Hell, S. W., Analytical description of STED microscopy performance. *Opt*  
306 *Express* **2010**, *18* (25), 26417-29.
- 307 8. Galiani, S.; Harke, B.; Vicidomini, G.; Lignani, G.; Benfenati, F.; Diaspro, A.; Bianchini, P., Strategies to  
308 maximize the performance of a STED microscope. *Opt Express* **2012**, *20* (7), 7362-74.
- 309 9. Hebisch, E.; Wagner, E.; Westphal, V.; Sieber, J. J.; Lehnart, S. E., A protocol for registration and correction  
310 of multicolour STED superresolution images. *J Microsc* **2017**, *267* (2), 160-175.
- 311 10. Merino, D.; Mallabiarrena, A.; Andilla, J.; Artigas, D.; Zimmermann, T.; Loza-Alvarez, P., STED imaging  
312 performance estimation by means of Fourier transform analysis. *Biomed Opt Express* **2017**, *8* (5), 2472-2482.
- 313 11. Combs, C. A.; Sackett, D. L.; Knutson, J. R., A simple empirical algorithm for optimising depletion power  
314 and resolution for dye and system specific STED imaging. *J Microsc* **2019**, *274* (3), 168-176.
- 315 12. Banterle, N.; Bui, K. H.; Lemke, E. A.; Beck, M., Fourier ring correlation as a resolution criterion for super-  
316 resolution microscopy. *J Struct Biol* **2013**, *183* (3), 363-367.
- 317 13. Nieuwenhuizen, R. P.; Lidke, K. A.; Bates, M.; Puig, D. L.; Grünwald, D.; Stallinga, S.; Rieger, B., Measuring  
318 image resolution in optical nanoscopy. *Nat Methods* **2013**, *10* (6), 557-62.
- 319 14. Tortarolo, G.; Castello, M.; Diaspro, A.; Koho, S.; Vicidomini, G., Evaluating image resolution in stimulated  
320 emission depletion microscopy. *Optica* **2018**, *5* (1), 32-35.
- 321 15. Descloux, A.; Großmayer, K. S.; Radenovic, A., Parameter-free image resolution estimation based on  
322 decorrelation analysis. *Nat Methods* **2019**, *16* (9), 918-924.

- 323 16. Wiseman, P. W., Image correlation spectroscopy: principles and applications. *Cold Spring Harb Protoc*  
324 **2015**, 2015 (4), 336-48.
- 325 17. Scipioni, L.; Gratton, E.; Diaspro, A.; Lanzanò, L., Phasor Analysis of Local ICS Detects Heterogeneity in  
326 Size and Number of Intracellular Vesicles. *Biophys J* **2016**, 111 (3), 619-629.
- 327 18. Oneto, M.; Scipioni, L.; Sarmiento, M. J.; Cainero, I.; Pelicci, S.; Furia, L.; Pelicci, P. G.; Dellino, G. I.;  
328 Bianchini, P.; Faretta, M.; Gratton, E.; Diaspro, A.; Lanzano, L., Nanoscale Distribution of Nuclear Sites by Super-  
329 Resolved Image Cross-Correlation Spectroscopy. *Biophys J* **2019**, 117 (11), 2054-2065.
- 330 19. Cainero, I.; Cerutti, E.; Faretta, M.; Dellino, G. I.; Pelicci, P. G.; Diaspro, A.; Lanzanò, L., Measuring  
331 Nanoscale Distances by Structured Illumination Microscopy and Image Cross-Correlation Spectroscopy (SIM-ICCS).  
332 *Sensors (Basel)* **2021**, 21 (6).
- 333 20. Ciccotosto, G. D.; Kozer, N.; Chow, T. T.; Chon, J. W.; Clayton, A. H., Aggregation distributions on cells  
334 determined by photobleaching image correlation spectroscopy. *Biophys J* **2013**, 104 (5), 1056-64.
- 335 21. Scipioni, L.; Di Bona, M.; Vicidomini, G.; Diaspro, A.; Lanzanò, L., Local raster image correlation  
336 spectroscopy generates high-resolution intracellular diffusion maps. *Commun Biol* **2018**, 1, 10.
- 337 22. Hebert, B.; Costantino, S.; Wiseman, P. W., Spatiotemporal image correlation spectroscopy (STICS)  
338 theory, verification, and application to protein velocity mapping in living CHO cells. *Biophys J* **2005**, 88 (5), 3601-  
339 14.
- 340 23. Grignani, F.; Ferrucci, P. F.; Testa, U.; Talamo, G.; Fagioli, M.; Alcalay, M.; Mencarelli, A.; Peschle, C.;  
341 Nicoletti, I., The acute promyelocytic leukemia-specific PML-RAR alpha fusion protein inhibits differentiation and  
342 promotes survival of myeloid precursor cells. *Cell* **1993**, 74 (3), 423-31.
- 343 24. Lanzanò, L.; Coto Hernández, I.; Castello, M.; Gratton, E.; Diaspro, A.; Vicidomini, G., Encoding and  
344 decoding spatio-temporal information for super-resolution microscopy. *Nat Commun* **2015**, 6, 6701.
- 345 25. Sarmiento, M. J.; Oneto, M.; Pelicci, S.; Pesce, L.; Scipioni, L.; Faretta, M.; Furia, L.; Dellino, G. I.; Pelicci,  
346 P. G.; Bianchini, P.; Diaspro, A.; Lanzanò, L., Exploiting the tunability of stimulated emission depletion microscopy  
347 for super-resolution imaging of nuclear structures. *Nat Commun* **2018**, 9 (1), 3415.
- 348 26. Pelicci, S.; Tortarolo, G.; Vicidomini, G.; Diaspro, A.; Lanzanò, L., Improving SPLIT-STED super-resolution  
349 imaging with tunable depletion and excitation power. *Journal of Physics D: Applied Physics* **2020**, 53 (23), 234003.
- 350 27. Finn, E. H.; Misteli, T., Molecular basis and biological function of variability in spatial genome organization.  
351 *Science* **2019**, 365 (6457).
- 352 28. Cutrale, F.; Rodriguez, D.; Hortigüela, V.; Chiu, C. L.; Otterstrom, J.; Mieruszynski, S.; Seriola, A.;  
353 Larrañaga, E.; Raya, A.; Lakadamyali, M.; Fraser, S. E.; Martinez, E.; Ojosnegros, S., Using enhanced number and  
354 brightness to measure protein oligomerization dynamics in live cells. *Nat Protoc* **2019**, 14 (2), 616-638.
- 355 29. Işbilir, A.; Serfling, R.; Möller, J.; Thomas, R.; De Faveri, C.; Zabel, U.; Scarselli, M.; Beck-Sickinger, A.  
356 G.; Bock, A.; Coin, I.; Lohse, M. J.; Annibale, P., Determination of G-protein-coupled receptor oligomerization by  
357 molecular brightness analyses in single cells. *Nat Protoc* **2021**, 16 (3), 1419-1451.
- 358 30. Koho, S.; Tortarolo, G.; Castello, M.; Deguchi, T.; Diaspro, A.; Vicidomini, G., Fourier ring correlation  
359 simplifies image restoration in fluorescence microscopy. *Nat Commun* **2019**, 10 (1), 3103.
- 360 31. Ringemann, C.; Harke, B.; Von Middendorff, C.; Medda, R.; Honigmann, A.; Wagner, R.; Leutenegger,  
361 M.; Schönle, A.; Hell, S. W.; Eggeling, C., Exploring single-molecule dynamics with fluorescence nanoscopy. *New*  
362 *Journal of Physics* **2009**, 11 (10), 103054.
- 363 32. Ma, Y.; Ha, T., Fight against background noise in stimulated emission depletion nanoscopy. *Phys Biol* **2019**,  
364 16 (5), 051002.
- 365 33. Lanzanò, L.; Scipioni, L.; Di Bona, M.; Bianchini, P.; Bizzarri, R.; Cardarelli, F.; Diaspro, A.; Vicidomini, G.,  
366 Measurement of nanoscale three-dimensional diffusion in the interior of living cells by STED-FCS. *Nat Commun*  
367 **2017**, 8 (1), 65.
- 368 34. Cainero, I.; Cerutti, E.; Faretta, M.; Dellino, G. I.; Pelicci, P. G.; Bianchini, P.; Vicidomini, G.; Diaspro, A.;  
369 Lanzanò, L., Chromatin investigation in the nucleus using a phasor approach to structured illumination microscopy.  
370 *Biophys J* **2021**.

- 371 35. Coto Hernández, I.; Castello, M.; Tortarolo, G.; Jowett, N.; Diaspro, A.; Lanzaò, L.; Vicidomini, G.,  
372 Efficient two-photon excitation stimulated emission depletion nanoscope exploiting spatiotemporal information.  
373 *Neurophotonics* **2019**, *6* (4), 045004.
- 374 36. Baddeley, D.; Chagin, V. O.; Schermelleh, L.; Martin, S.; Pombo, A.; Carlton, P. M.; Gahl, A.; Domaing,  
375 P.; Birk, U.; Leonhardt, H.; Cremer, C.; Cardoso, M. C., Measurement of replication structures at the nanometer  
376 scale using super-resolution light microscopy. *Nucleic Acids Res* **2010**, *38* (2), e8.
- 377 37. Sankaran, J.; Balasubramanian, H.; Tang, W. H.; Ng, X. W.; Röllin, A.; Wohland, T., Simultaneous  
378 spatiotemporal super-resolution and multi-parametric fluorescence microscopy. *Nat Commun* **2021**, *12* (1), 1748.
- 379 38. Comeau, J. W.; Kolin, D. L.; Wiseman, P. W., Accurate measurements of protein interactions in cells via  
380 improved spatial image cross-correlation spectroscopy. *Mol Biosyst* **2008**, *4* (6), 672-85.

## 381 ACKNOWLEDGEMENTS

382 This work was supported by Associazione Italiana per la Ricerca sul Cancro (AIRC) through MFAG (My First AIRC  
383 Grant) Grant ID 21931 and from University of Catania under the program Programma Ricerca di Ateneo UNICT  
384 2020-2022-linea 2. The authors gratefully acknowledge the Bio-Nanotech Research and Innovation Tower (BRIT;  
385 PON project financed by the Italian Ministry for Education, University and Research MIUR).

## 386 AUTHOR CONTRIBUTIONS

387 E.C., A.D. and L.L. designed the study, conceived the experiments and wrote the manuscript. E.C., I.C. and M.D.  
388 prepared samples. E.C. and P.B. collected data. L.L. wrote software. E.C., G.I.D, M.F., G.V., P.G.P., A.D. and L.L.  
389 analysed data and discussed results. All authors critically reviewed the manuscript.

## 390 ADDITIONAL INFORMATION

391 The authors declare no competing interests.

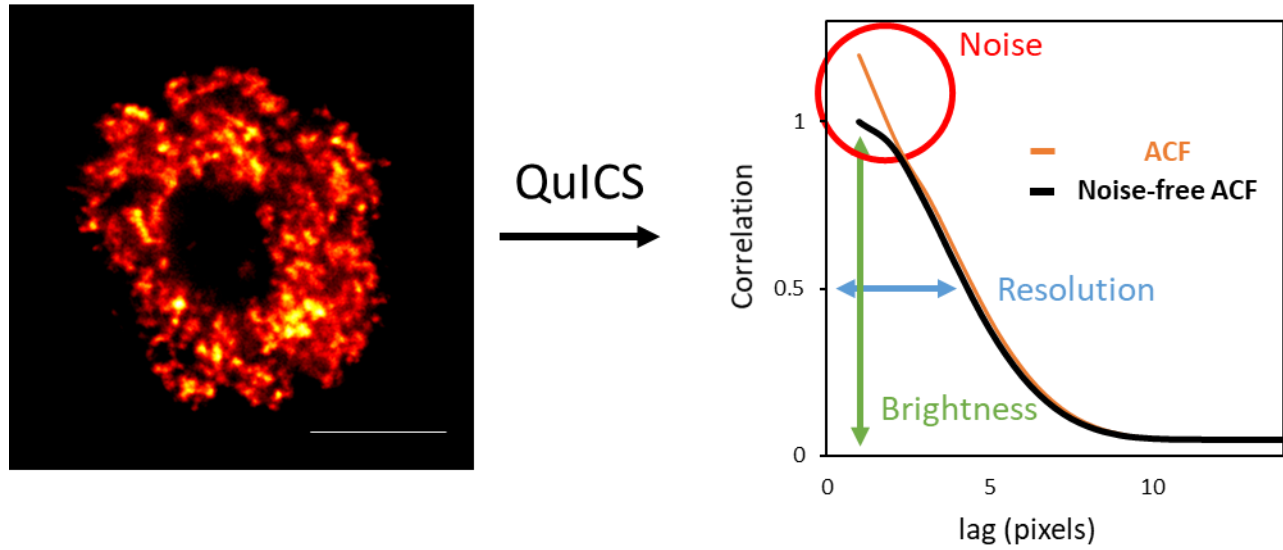

392 **Figure 1. Autocorrelation function (ACF) as a source of information about image quality**

393 Schematic representation of the application of the QuICS algorithm to an image of a nuclear process (DNA  
394 replication sites). The algorithm calculates a radial autocorrelation function (ACF, orange line) and performs a  
395 Gaussian fit of the estimated noise-free ACF (black line). The three parameters that are extracted are: the  
396 Resolution (in blue), calculated from the width of the noise-free ACF, the Brightness (in green), calculated from  
397 the amplitude of the noise-free ACF, and the Noise (in red), calculated from the difference in amplitude between  
398 the ACF and the noise-free ACF. Scale bar represents 3  $\mu\text{m}$ .

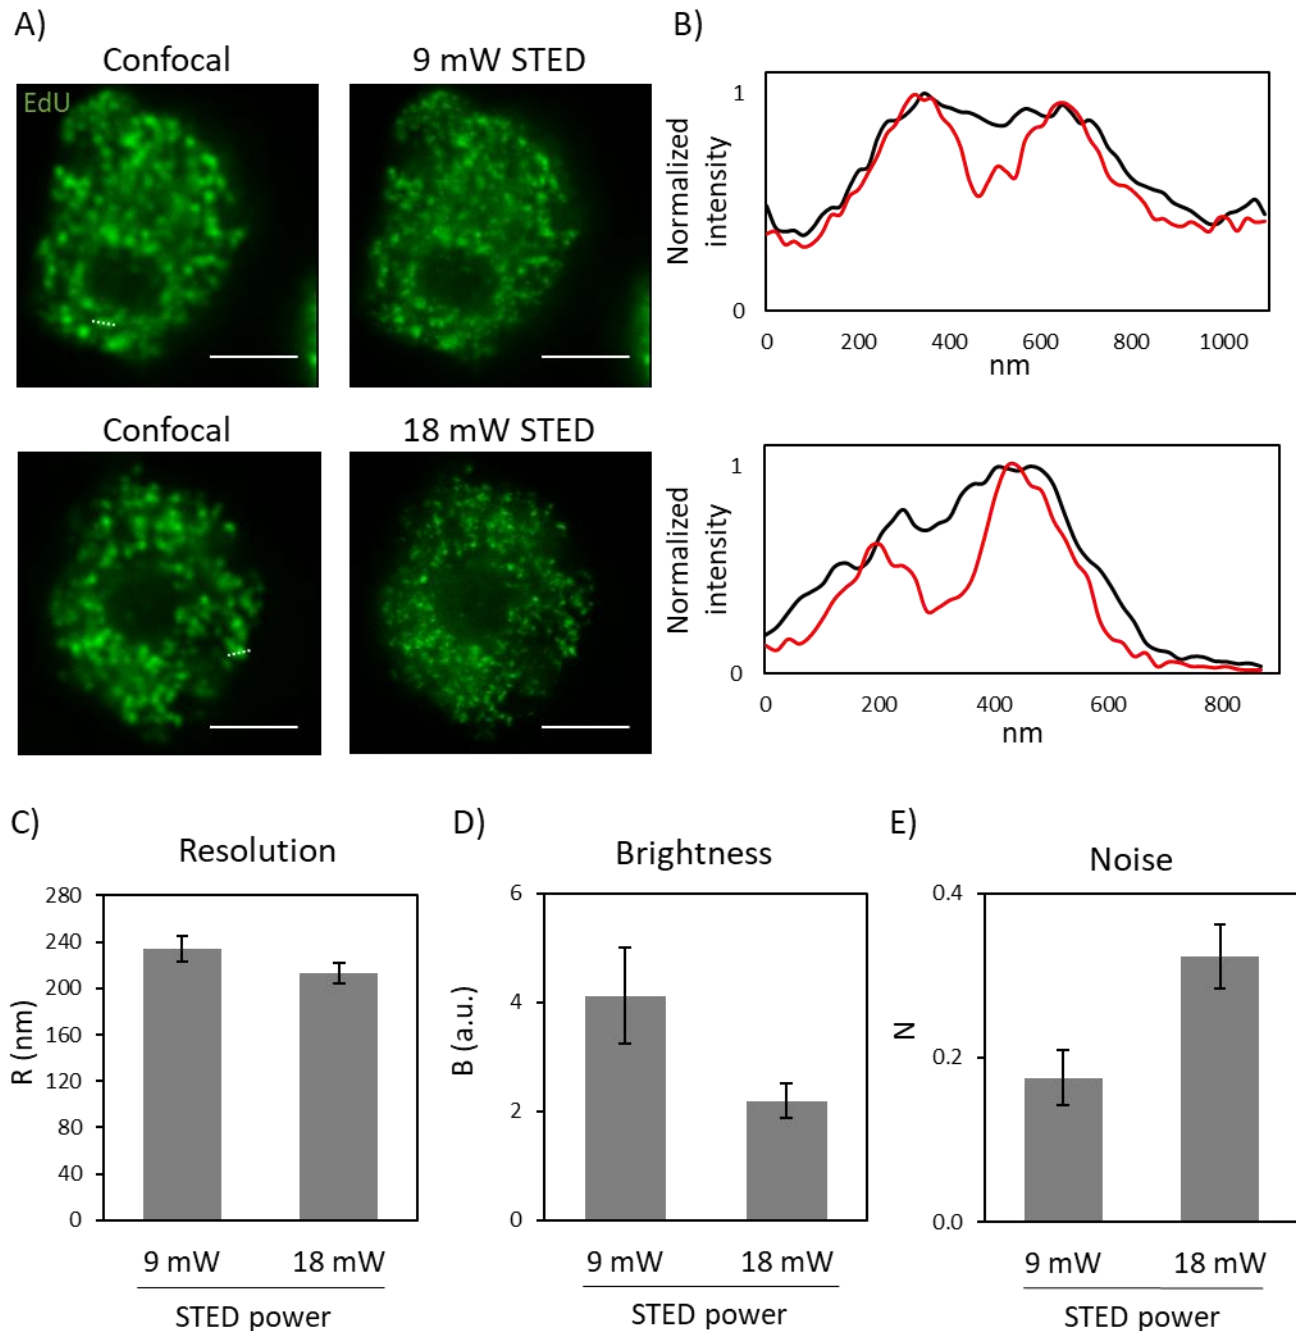

399 **Figure 2. Tuning of STED power**

400 **A)** Representative images of U937-PR9 cells upon staining of DNA replication foci through incorporation of EdU  
401 labeled with Alexa azide 488 (Click reaction). (top) Sequential acquisition of a confocal image, followed by a STED  
402 image with a 9 mW depletion beam. (bottom) Sequential acquisition of a confocal image, followed by a STED  
403 image with a 18 mW depletion beam. Scale bars represent 3  $\mu\text{m}$ . **B)** Line profiles of structures from images in A).  
404 (top) Comparison between the line profiles of the same structure in the confocal (black line) and the STED (red

405 line) images in the top row of panel A). The measured structure is defined by a white dotted line in the confocal  
406 image. (bottom) Comparison between the line profiles of the same structure in the confocal (black line) and the  
407 STED (red line) images in the bottom row of panel A). The measured structure is defined by a white dotted line in  
408 the confocal image. **C) D) E)** Quantification of Resolution, Brightness, and Noise parameters by application of the  
409 QuICS algorithm. At least ten images for each condition have been acquired. Error bars represent the SEM.



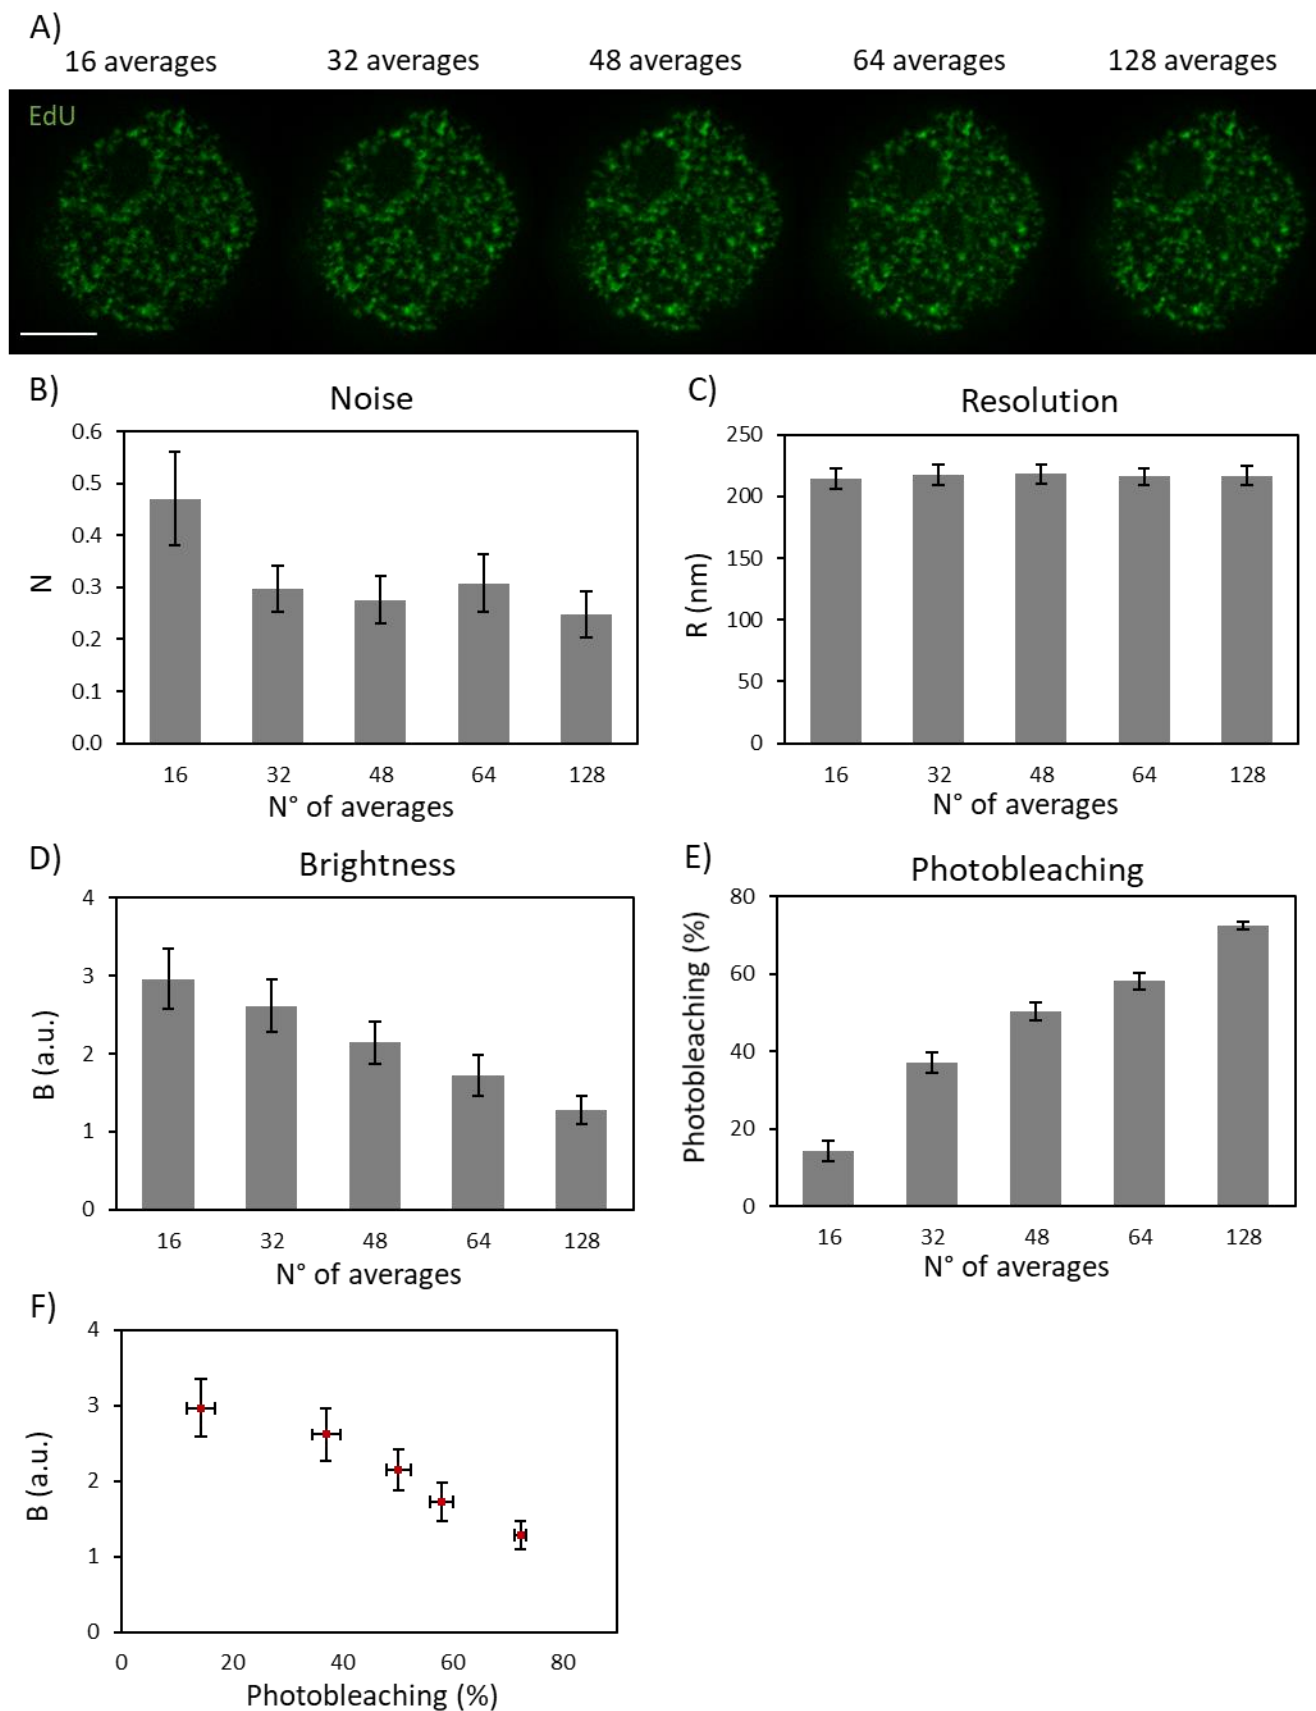

411 **Figure 3. Increasing number of averages**

412 **A)** Representative images of U937-PR9 cells upon staining of DNA replication foci. Each image is obtained by  
413 combining and averaging STED images after each acquisition step of increasing number of line-averages (see  
414 Methods for a detailed description of acquisition settings) Scale bar represents 3  $\mu\text{m}$ . **B) C) D)** Quantification of  
415 Resolution, Brightness and Noise parameters in function of the number of line-averages by application of the  
416 QuICS algorithm. At least ten images for each condition have been acquired. **E)** Quantification of Photobleaching  
417 in function of the number of line-averages. Photobleaching was calculated as the percentage reduction of average  
418 fluorescence intensity with respect to the initial value. **F)** Representation of the Brightness variation in function of  
419 the Photobleaching. At least ten images for each condition have been quantified. Error bars represent the SEM.

420

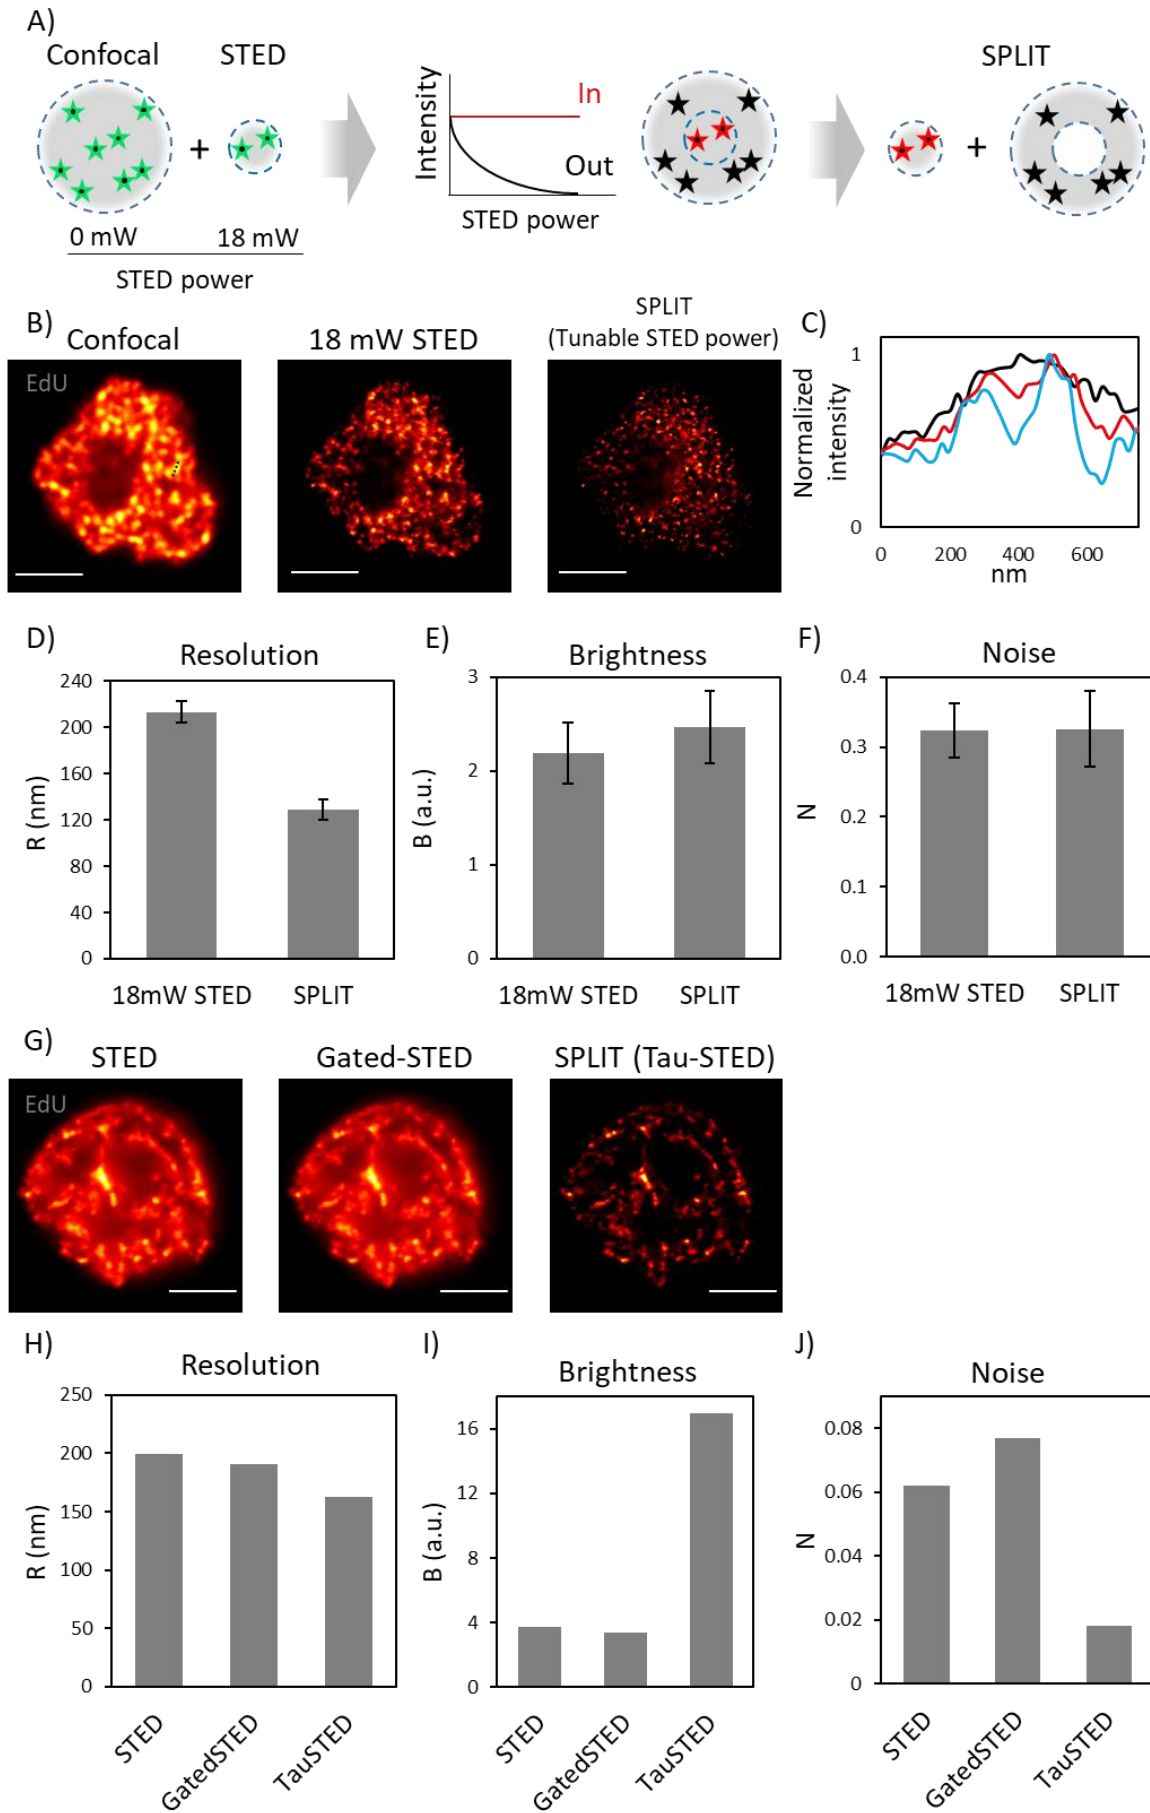

421 **Figure 4. Comparison between SPLIT and STED imaging**

422 **A)** Schematic representation of the SPLIT principle using a tunable STED power. The sequential acquisition with  
423 an increased STED power from 0 to 18 mW, allow to obtain the extra information about the fluorescence depletion  
424 dynamics of photons arising from the center (in) and the periphery (out) of the PSF. **B)** Representative images of  
425 U937-PR9 cells upon staining of DNA replication foci. Sequential acquisition of a confocal image (STED power: 0  
426 mW) and a STED image with a 18 mW depletion beam, followed by the resulting SPLIT image. Scale bars represent  
427 3  $\mu\text{m}$ . **C)** Comparison between the line profiles of the same structure in the confocal (black line), the STED (red  
428 line) and the SPLIT (blue line) images of panel B). The measured structure is defined by a black dotted line in the  
429 confocal image. **D) E) F)** Quantification of Resolution, Brightness, and Noise parameters by application of the QuICS  
430 algorithm. At least ten 18 mW STED images have been acquired and compared to the resulting SPLIT images. Error  
431 bars represent the SEM. **G)** Images of U937-PR9 cells upon staining of DNA replication foci through incorporation  
432 of EdU labeled with Alexa azide 594. Images acquired with the Leica Stellaris 8 Tau-STED microscope. Shown are  
433 the raw STED image, the gated-STED image with a time-gating of 1-8 ns and the Tau STED image. Scale bars  
434 represent 3  $\mu\text{m}$ . **H) I) J)** Quantification of Resolution, Brightness, and Noise parameters of images shown in G) by  
435 application of the QuICS algorithm. The analysis in G-J is representative of the analysis on three cells yielding  
436 similar results.

437

438

A) Autocorrelation fit

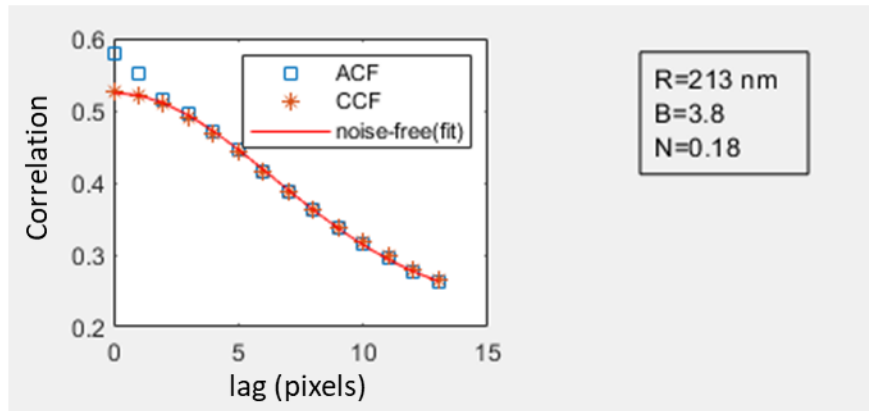

B) Crosscorrelation fit

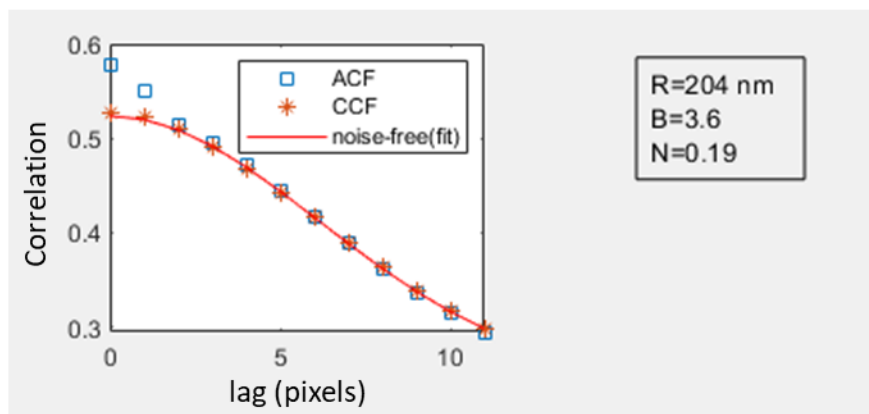

439

440 **Supplementary Figure 1. Noise-free correlation function extraction**

441 Shown is an example of data obtained with the QuICS algorithm from the same image. Panel **A)** shows a fit of the  
442 autocorrelation function, excluding the first three points, and the relative extracted parameters: R, B, N. Panel **B)**  
443 shows the fit of the crosscorrelation function between two statistically independent images obtained through  
444 chessboard downsampling, and the relative extracted parameters.

445
